# Supplementary material for: Differences in soil biological activity by terrain types at the sub-field scale in central Iowa US
Source: PLoS One. 2017 Jul 7;12(7):e0180596. doi: 10.1371/journal.pone.0180596 (PMC5501568; doi:10.1371/journal.pone.0180596)
Supplement: S1 File — This file includes easting and northing coordinates for each sample, the assigned cluster from the SOM, the moisture content (g/g), fresh weight to dry weight ratio, pH, MBC (ug C/ g DW), MBN (ug N/ g DW), Specific C mineralization, Specific N Mineralization, percent total carbon, percent total nitrogen, elevation (m), slope, aspect (degrees), plan curvature, horizontal-polarization EMI (mS/m), and vertical-polarization EMI (mS/m). (XLSX) [file pone.0180596.s001.xlsx]

## Sheet: Sheet1
Sample ID	Easting	Northing	Cluster	% Moisture (g/g)	FW:DW	pH	MBC, Corrected (ug C/ g DW)	MBN, Corrected (ug N/ g DW)	EOC (ug C/g DW)	Cmin/MBC	Nmin/MBC	%TC	%TN	Elevation (m)	Slope	Aspect (degrees)	Plan_Curv	H_EMI (mS/m)	V_EMI (mS/m)
BMU_1	443290	4.64779e+06	1	11.72	1.13	8.35	334.07	41.87	35.82	0.0193	0.001486	3.692	0.1858	311.5	0.817561	179.351	2.67e-05	57.3972	41.1978
BMU_2	443269	4.64828e+06	2	8.64	1.09	7.28	141.29	21.19	14.67	0.04561	0	1.382	0.0736	312.9	1.65687	94.6627	-0.02005	37.3655	24.21
BMU_3	443107	4.6485e+06	3	12.28	1.14	6.39	190.22	25.02	30.47	0.0512	0.005084	2.151	0.129	313.15	1.13634	264.266	-0.00310429	38.4461	25.9
LG1	443360	4.64821e+06	3	10.93	1.12	6.05	139.51	15.58	22.74	0.04925	0.002811	2.152	0.1352	312.8	1.23625	340.213	-0.0251584	37.4039	24.4029
LG10	443300	4.64802e+06	3	11.12	1.13	5.8	209.07	22.07	22.55	0.03477	0.001685	2.283	0.1831	313.803	1.89965	333.687	-0.00879431	36.8569	23.3684
LG11	443138	4.64786e+06	3	12.31	1.14	6.12	296.96	29.17	25.88	0.03185	0.002751	3.123	0.2086	312.598	0.421361	319.217	-0.0627075	47.7835	30.7873
LG12	442894	4.6484e+06	3	14.12	1.16	7.27	261.09	33.18	29.82	0.02756	0.001611	3.05	0.2088	313.111	0.573017	300.857	-0.00945924	36.6258	26.6412
LG13	442965	4.64842e+06	2	10.52	1.12	6.73	202.16	29.89	52.69	0.0474	0.00449	2.834	0.1846	313.35	0.735182	130.312	0.0356093	31.9479	21.7493
LG14	443087	4.64839e+06	1	17.67	1.21	8.43	502.8	64.4	45.59	0.01359	0.000914	6.162	0.3441	312.002	0.575347	179.442	-0.00488443	64.6161	48.0122
LG15	443269	4.64847e+06	2	9.61	1.11	5.65	137.47	14.32	40.44	0.08241	0.006911	2.138	0.1256	313.048	1.64463	59.2168	0.00120172	30.635	20.3396
LG16	443756	4.64842e+06	3	11.26	1.13	5.65	195.89	22.37	34.14	0.04562	0.001753	2.522	0.1609	312.005	1.04444	246.622	-0.035468	33.3061	23.2442
LG17	443715	4.6479e+06	1	8.85	1.1	7.19	178.02	22.5	37.29	0.06929	0.003643	2.236	0.1595	310.401	0.497748	122.271	-0.0228122	60.7164	41.4088
LG18	443674	4.64833e+06	1	13.72	1.16	8.27	392.96	48.45	60.14	0.02569	0.001518	4.959	0.2798	311.101	0.407013	247.097	0.188884	50.7019	40.8555
LG19	443427	4.64784e+06	1	14.8	1.17	8.36	391.69	50.95	66.16	0.02319	0.000904	3.881	0.2304	311.752	0.758885	289.623	0.0250127	55.6688	38.3643
LG2	443117	4.64801e+06	1	15.38	1.18	6.64	345.42	39.19	36.57	0.04207	0.002026	3.953	0.2794	311.901	0.868987	161.32	-0.075009	64.3647	42.1087
LG20	443563	4.64812e+06	2	7.22	1.08	6.41	110.98	12.81	30.36	0.1251	0.003338	1.209	0.0683	313.179	3.27292	172.723	0.00565265	28.171	17.2708
LG21	443314	4.64814e+06	3	8.93	1.1	7.03	201.64	25.9	21.69	0.03341	0.001725	1.483	0.09	313.8	2.06682	317.187	0.05607	31.3114	20.8007
LG22	443173	4.64812e+06	2	9.76	1.11	6.46	149.11	15.31	31.6	0.07225	0.002964	2.449	0.1507	313.796	2.13628	173.222	0.00862697	31.077	19.5836
LG23	442970	4.64823e+06	2	10.94	1.12	5.35	185.42	22.36	26.38	0.03117	0.002154	1.865	0.1323	314.101	2.12774	36.522	-0.00220107	24.9629	15.259
LG24	442908	4.64827e+06	3	10.11	1.11	6.4	224.02	25.23	31.96	0.04734	0.002048	2.025	0.1384	313.198	2.13375	307.447	-0.0121604	34.7829	22.2391
LG25	443706	4.64802e+06	3	10.48	1.12	6.67	170.64	23.38	23.57	0.0444	0.002835	2.027	0.1543	311.799	0.842199	263.243	0.0193966	31.7943	18.6924
LG3	443178	4.64819e+06	2	7.57	1.08	6.7	100.64	11.3	27.91	0.06836	0.004011	1.345	0.0762	314.452	2.12791	52.5869	0.0498212	27.3759	18.2628
LG4	443107	4.64826e+06	3	23.09	1.3	6.55	260.13	32.61	30.92	0.03786	0.00235	2.487	0.1658	313.699	2.33636	346.301	0.0222046	31.5813	20.8924
LG5	442925	4.64813e+06	3	12.66	1.14	5.92	212.51	20.8	27.53	0.05485	0.002125	2.652	0.2018	313.599	1.64048	288.975	0.0209159	39.5505	26.0954
LG6	443320	4.64793e+06	2	9.92	1.11	6.36	212.64	30.07	35.41	0.05202	0.002909	1.719	0.1082	313.398	2.98036	115.131	-0.00822878	33.6116	18.6318
LG7	443553	4647907	3	8.49	1.09	6.47	160.02	21.08	24.57	0.04923	0.003285	1.344	0.0829	312.876	1.6404	270.051	0.0163864	37.3479	20.9768
LG8	443644	4.64816e+06	2	9.31	1.1	5.75	146.6	16.76	30.28	0.08096	0.003586	1.924	0.1261	313.248	1.47592	120.434	-0.0772794	29.0746	19.2351
LG9	443421	4.6481e+06	2	8.19	1.09	6.11	176.24	21.42	22.2	0.08011	0.003374	1.67	0.1063	314.059	2.35	126.51	0.000798864	32.4466	20.6646
VO702	443138	4648428	1	14.8	1.17	7.74	318.96	37.1	34.82	0.03327	0.001529	3.618	0.2635	312.2	0.556206	180.424	-0.00145824	56.7999	44.0264
VO703	443538	4648428	1	12.98	1.15	8.2	333.02	36.65	37.63	0.02314	0.001494	5.107	0.248	310.224	0.361139	88.4509	-0.0789932	37.7558	27.5541
VO704	443390	4648370	1	12.91	1.15	8.37	311.04	43.38	36.31	0.02326	0.000883	3.037	0.2117	311.05	0.864381	126.71	-0.090483	54.1557	43.1017
VO706	443461	4648224	2	9.41	1.1	6.37	220.36	24.04	36.56	0.06728	0.002423	2.043	0.1414	314.36	0.667361	319.688	-0.123208	31.211	21.2614
VO712	443538	4648028	1	13.99	1.16	6.75	349.78	42.67	33.06	0.06074	0.002387	3.285	0.2293	311.083	0.308387	150.271	-0.0404778	52.9555	33.7834
VO713	443638	4647928	2	19.83	1.25	5.75	206.07	20.98	40.73	0.07791	0.003992	2.4	0.1766	312.272	2.51875	89.862	-0.0318462	35.9424	21.2604
VO714	443238	4647828	1	14.91	1.18	6.87	381.44	35.41	23.94	0.03751	0.002028	4.159	0.3013	311.299	0.701717	157.076	0.0661551	74.7808	50.8935
VO715	443738	4647828	1	15.43	1.18	8.26	444.8	56.61	77.67	0.02641	0.002002	5.119	0.2634	310.214	0.382275	90.1479	-0.0407431	66.4155	44.3868
